# Supplementary material for: A Molecular Hepatocellular Carcinoma Prognostic Score System Precisely Predicts Overall Survival of Hepatocellular Carcinoma Patients
Source: PubMed Central journal article supplement — J Clin Transl Hepatol. 2021 Aug 20;10(2):273–83. doi: 10.14218/JCTH.2021.00010 (PMC9039713; doi:10.14218/jcth.2021.00010), 2021-08-20
Supplement: JCTH-10-273-s018.pdf [file JCTH-10-273-s018.pdf]

## TCGA and five independent cohorts

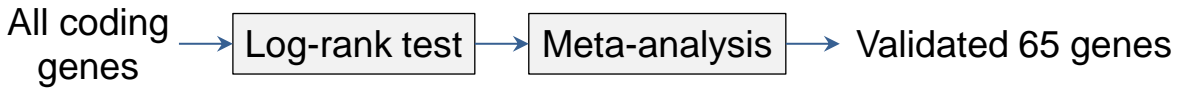

## TCGA+ICGC cohort (n=905)

Expression of 65 genes (P)

Patients survival at the third year (s)

Alive (s=0)

Deceased (s=1)

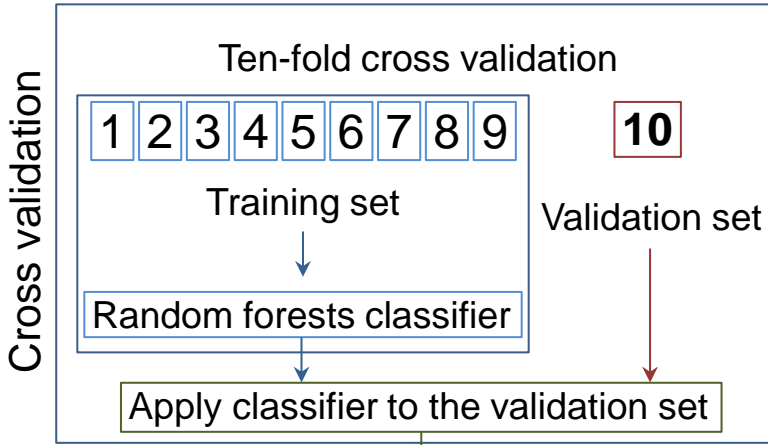

Sorted by importance values  
23 genes selected

*RALA, PLOD2...* Gene\_Expression ... *ITPR2, SLC2A2*

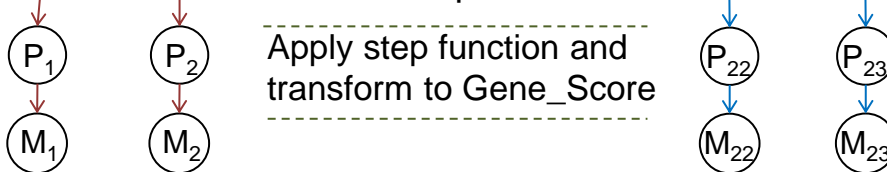

Softmax function

$$x_k = \frac{\exp(n_k)}{\sum_{i=1}^2 \exp(n_i)}$$

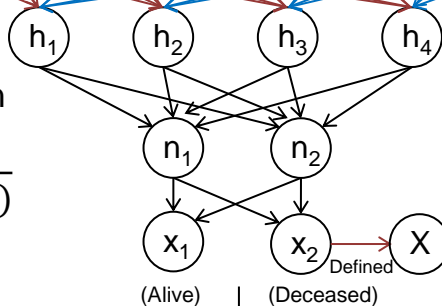

Loss function (F)  
(cross entropy error)

$$F = - \sum_{N=1}^{905} t_n \log X_N$$

Minimize loss function by a gradient descent method

Defined and calculate 'Gene\_Weight'
