# Supplementary material for: A Molecular Hepatocellular Carcinoma Prognostic Score System Precisely Predicts Overall Survival of Hepatocellular Carcinoma Patients
Source: PubMed Central journal article supplement — J Clin Transl Hepatol. 2021 Aug 20;10(2):273–83. doi: 10.14218/JCTH.2021.00010 (PMC9039713; doi:10.14218/jcth.2021.00010), 2021-08-20
Supplement: JCTH-10-273-s021.pdf [file JCTH-10-273-s021.pdf]

**A****TCGA-DD-A39Y-01**

|           | Gene expression | Gene score | Gene weight | Score x weight |
|-----------|-----------------|------------|-------------|----------------|
| RALA      | Above median    | 0          | 3.6386383   | 0              |
| PLOD2     | Above median    | 0          | 4.571733    | 0              |
| PPT1      | Above median    | 0          | 3.6378715   | 0              |
| CTSC      | Above median    | 0          | 2.929253    | 0              |
| ETV5      | Above median    | 0          | 3.15026     | 0              |
| ALDOA     | Above median    | 0          | 3.5781527   | 0              |
| ARPC2     | Above median    | 0          | 3.4750159   | 0              |
| SLC38A1   | Above median    | 0          | 4.9902163   | 0              |
| TM4SF1    | Above median    | 0          | 3.6512656   | 0              |
| PFKFB3    | Above median    | 0          | 4.242654    | 0              |
| RGN       | below median    | 0          | 3.4342885   | 0              |
| EPHX2     | below median    | 0          | 4.14249     | 0              |
| IQGAP2    | below median    | 0          | 3.2472568   | 0              |
| SLC22A7   | below median    | 0          | 3.2640932   | 0              |
| CYP27A1   | below median    | 0          | 3.2004652   | 0              |
| COBLL1    | below median    | 0          | 3.4549387   | 0              |
| CYP4F12   | below median    | 0          | 4.133354    | 0              |
| APOC3     | below median    | 0          | 3.7753599   | 0              |
| CDO1      | below median    | 0          | 3.1609652   | 0              |
| PAH       | below median    | 0          | 3.727815    | 0              |
| ITPR2     | below median    | 0          | 3.3972855   | 0              |
| SERPINA10 | below median    | 0          | 3.569119    | 0              |
| SLC2A2    | below median    | 0          | 2.9978447   | 0              |

mHPS 0

**B****TCGA-LG-A9QC-01**

|           | Gene expression | Gene score | Gene weight | Score x weight |
|-----------|-----------------|------------|-------------|----------------|
| RALA      | below median    | 1          | 3.6386383   | 3.6386383      |
| PLOD2     | below median    | 1          | 4.571733    | 4.571733       |
| PPT1      | below median    | 1          | 3.6378715   | 3.6378715      |
| CTSC      | Above median    | 0          | 2.929253    | 0              |
| ETV5      | below median    | 1          | 3.15026     | 3.15026        |
| ALDOA     | below median    | 1          | 3.5781527   | 3.5781527      |
| ARPC2     | below median    | 1          | 3.4750159   | 3.4750159      |
| SLC38A1   | below median    | 1          | 4.9902163   | 4.9902163      |
| TM4SF1    | below median    | 1          | 3.6512656   | 3.6512656      |
| PFKFB3    | below median    | 1          | 4.242654    | 4.242654       |
| RGN       | Above median    | 1          | 3.4342885   | 3.4342885      |
| EPHX2     | Above median    | 1          | 4.14249     | 4.14249        |
| IQGAP2    | Above median    | 1          | 3.2472568   | 3.2472568      |
| SLC22A7   | below median    | 0          | 3.2640932   | 0              |
| CYP27A1   | Above median    | 1          | 3.2004652   | 3.2004652      |
| COBLL1    | Above median    | 1          | 3.4549387   | 3.4549387      |
| CYP4F12   | Above median    | 1          | 4.133354    | 4.133354       |
| APOC3     | Above median    | 1          | 3.7753599   | 3.7753599      |
| CDO1      | Above median    | 1          | 3.1609652   | 3.1609652      |
| PAH       | Above median    | 1          | 3.727815    | 3.727815       |
| ITPR2     | Above median    | 1          | 3.3972855   | 3.3972855      |
| SERPINA10 | Above median    | 1          | 3.569119    | 3.569119       |
| SLC2A2    | Above median    | 1          | 2.9978447   | 2.9978447      |

mHPS 77.17699
