# Supplementary figures and images for: A Molecular Hepatocellular Carcinoma Prognostic Score System Precisely Predicts Overall Survival of Hepatocellular Carcinoma Patients
Source: PubMed Central journal article supplement — J Clin Transl Hepatol. 2021 Aug 20;10(2):273–83. doi: 10.14218/JCTH.2021.00010 (PMC9039713; doi:10.14218/jcth.2021.00010), 2021-08-20

**A**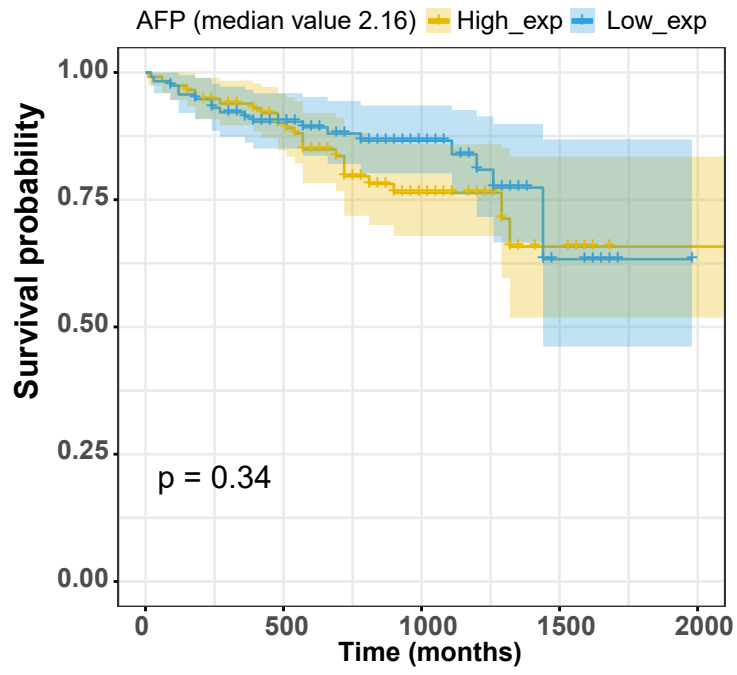**B**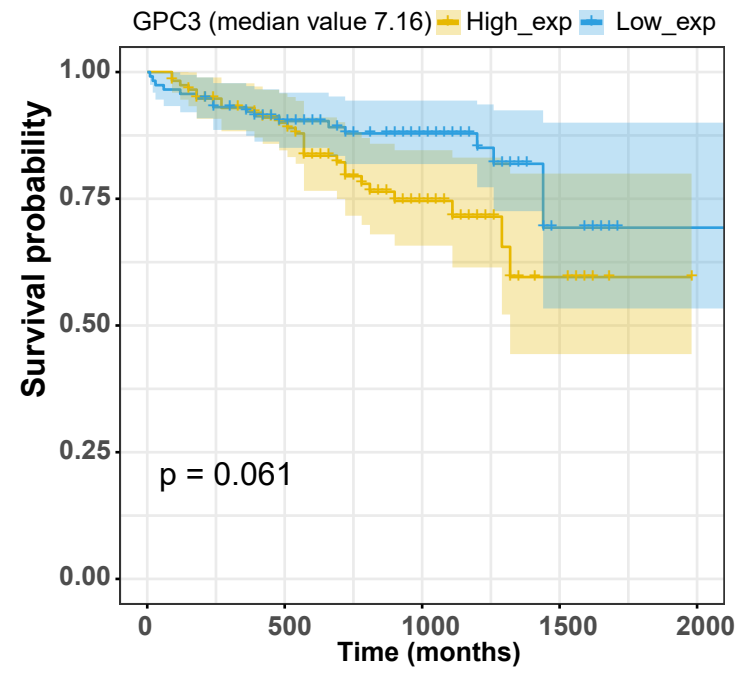

Supplement: JCTH-10-273-s019.pdf [file JCTH-10-273-s019.pdf]

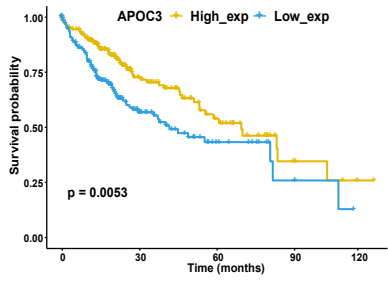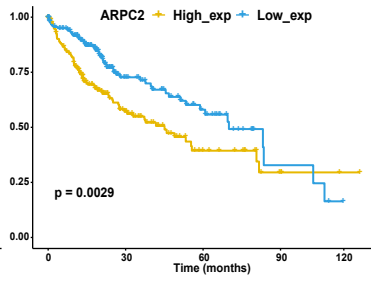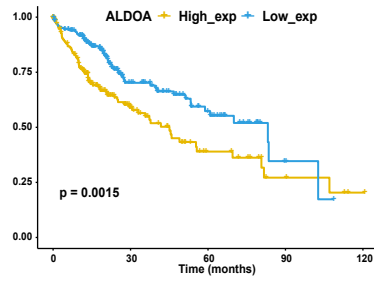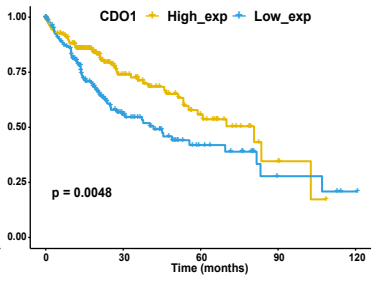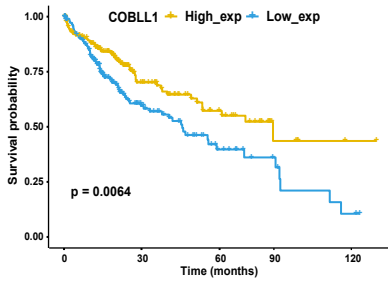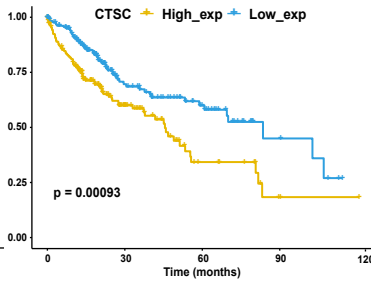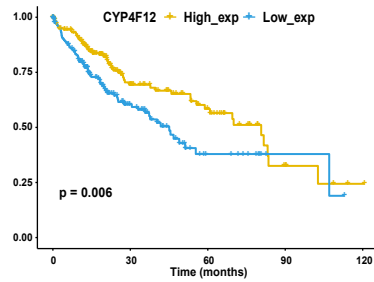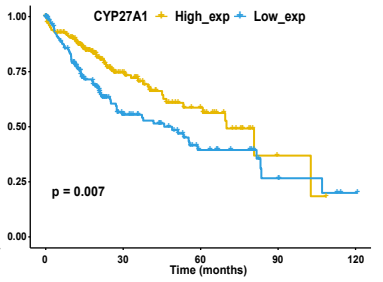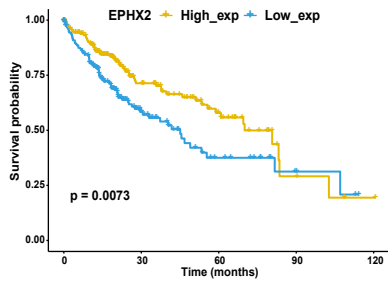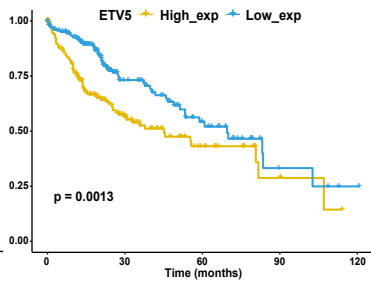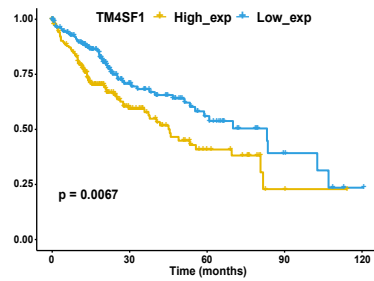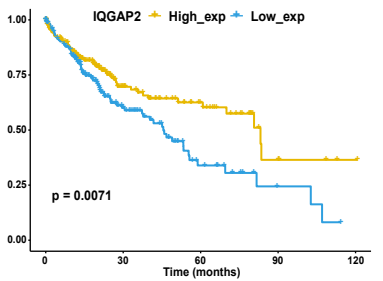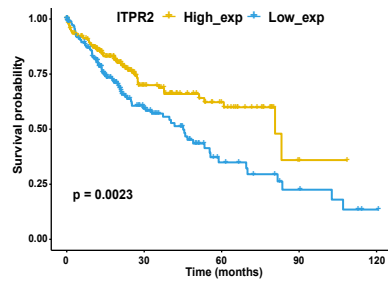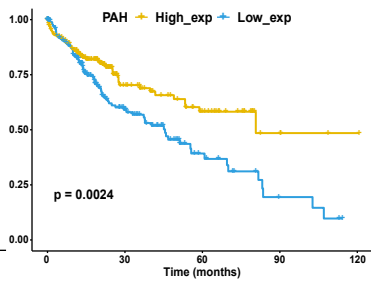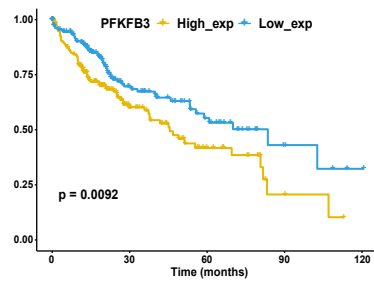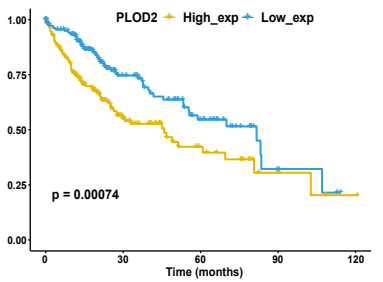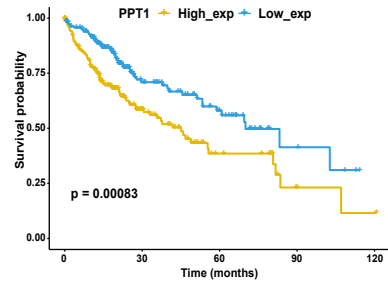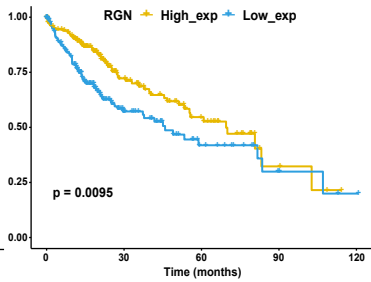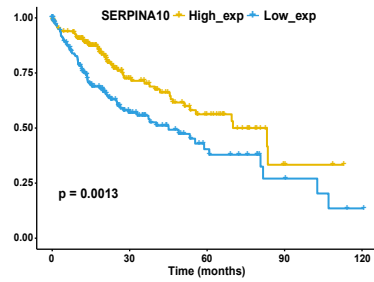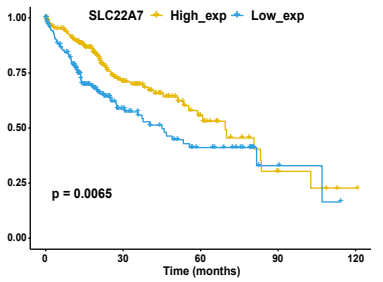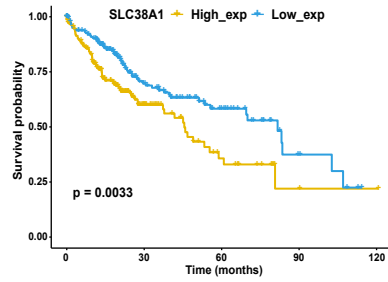

Supplement: JCTH-10-273-s020.pdf [file JCTH-10-273-s020.pdf]

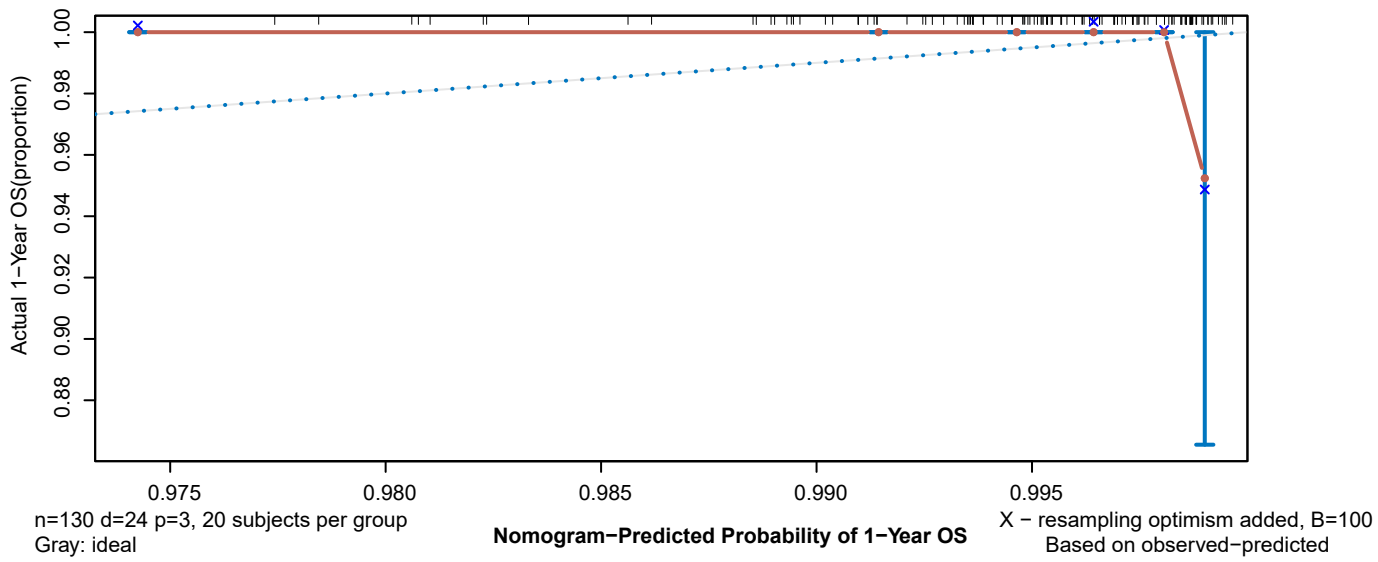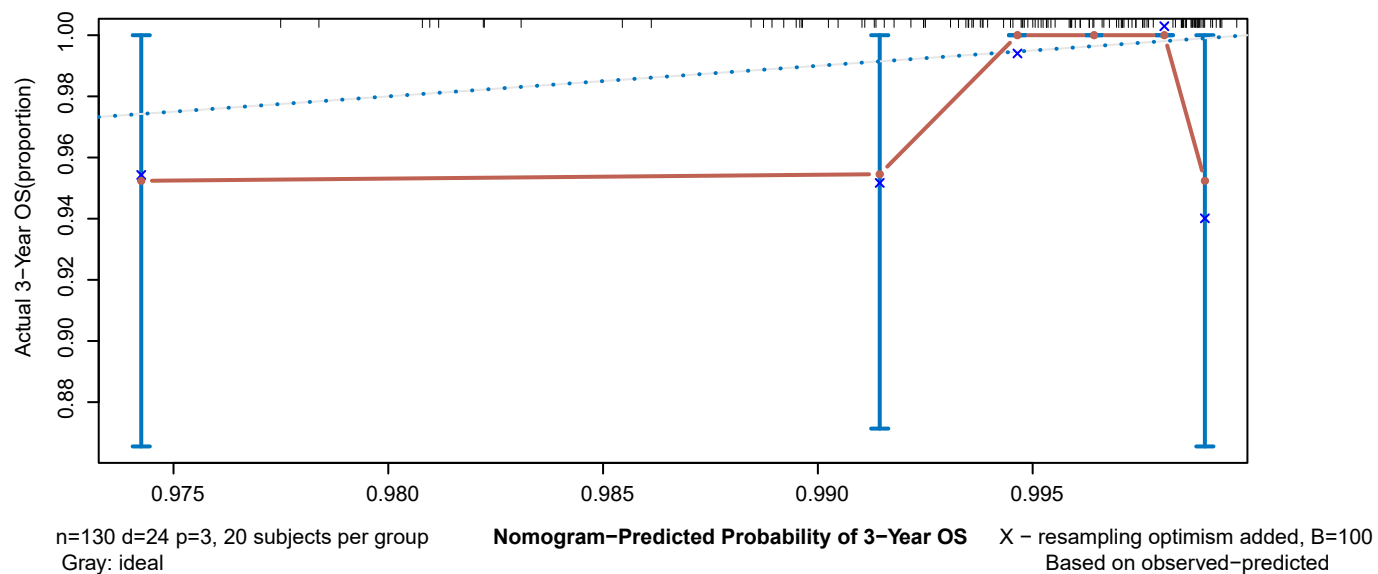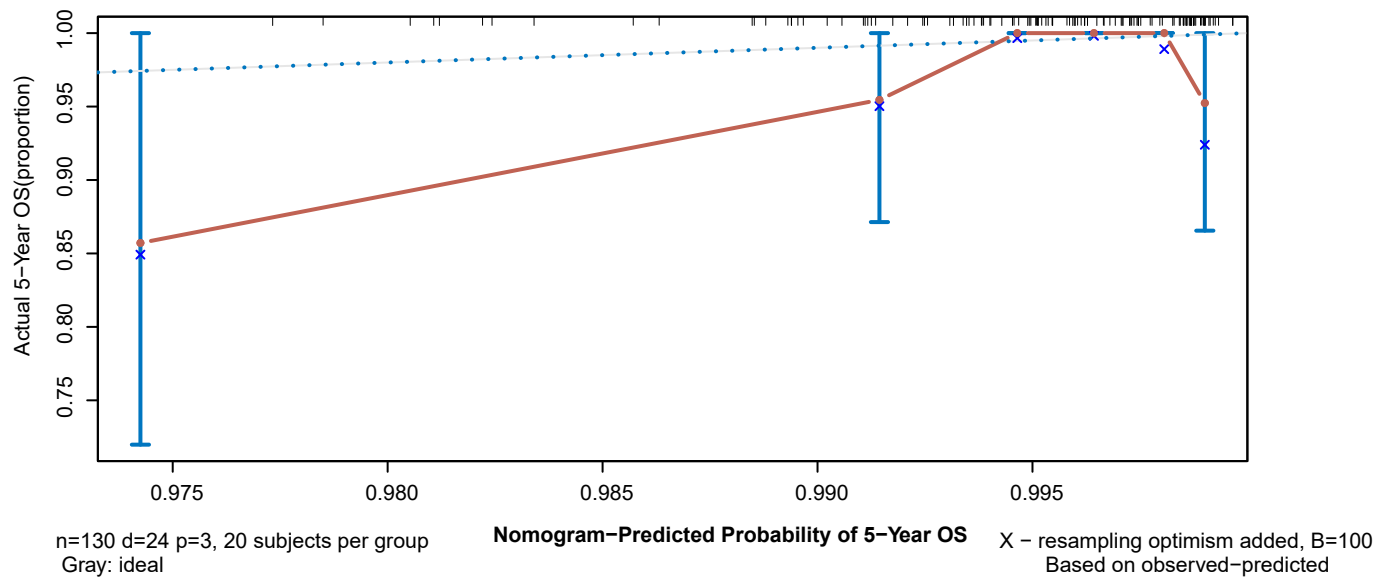

Supplement: JCTH-10-273-s022.pdf [file JCTH-10-273-s022.pdf]

Time-dependent ROC Year=3

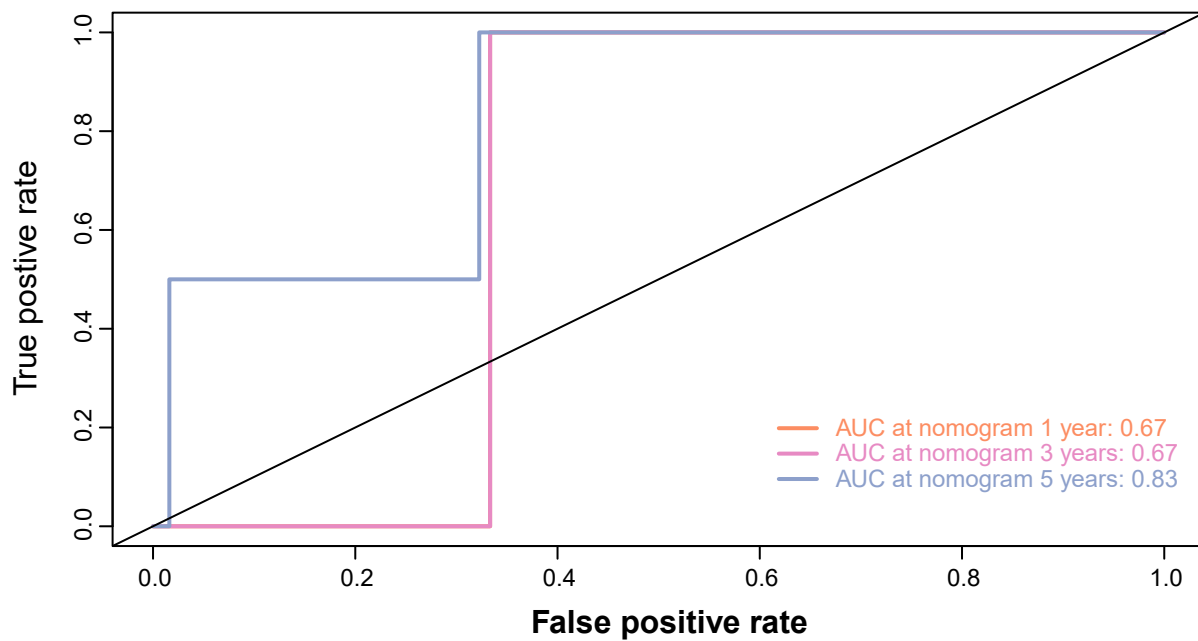

Supplement: JCTH-10-273-s023.pdf [file JCTH-10-273-s023.pdf]

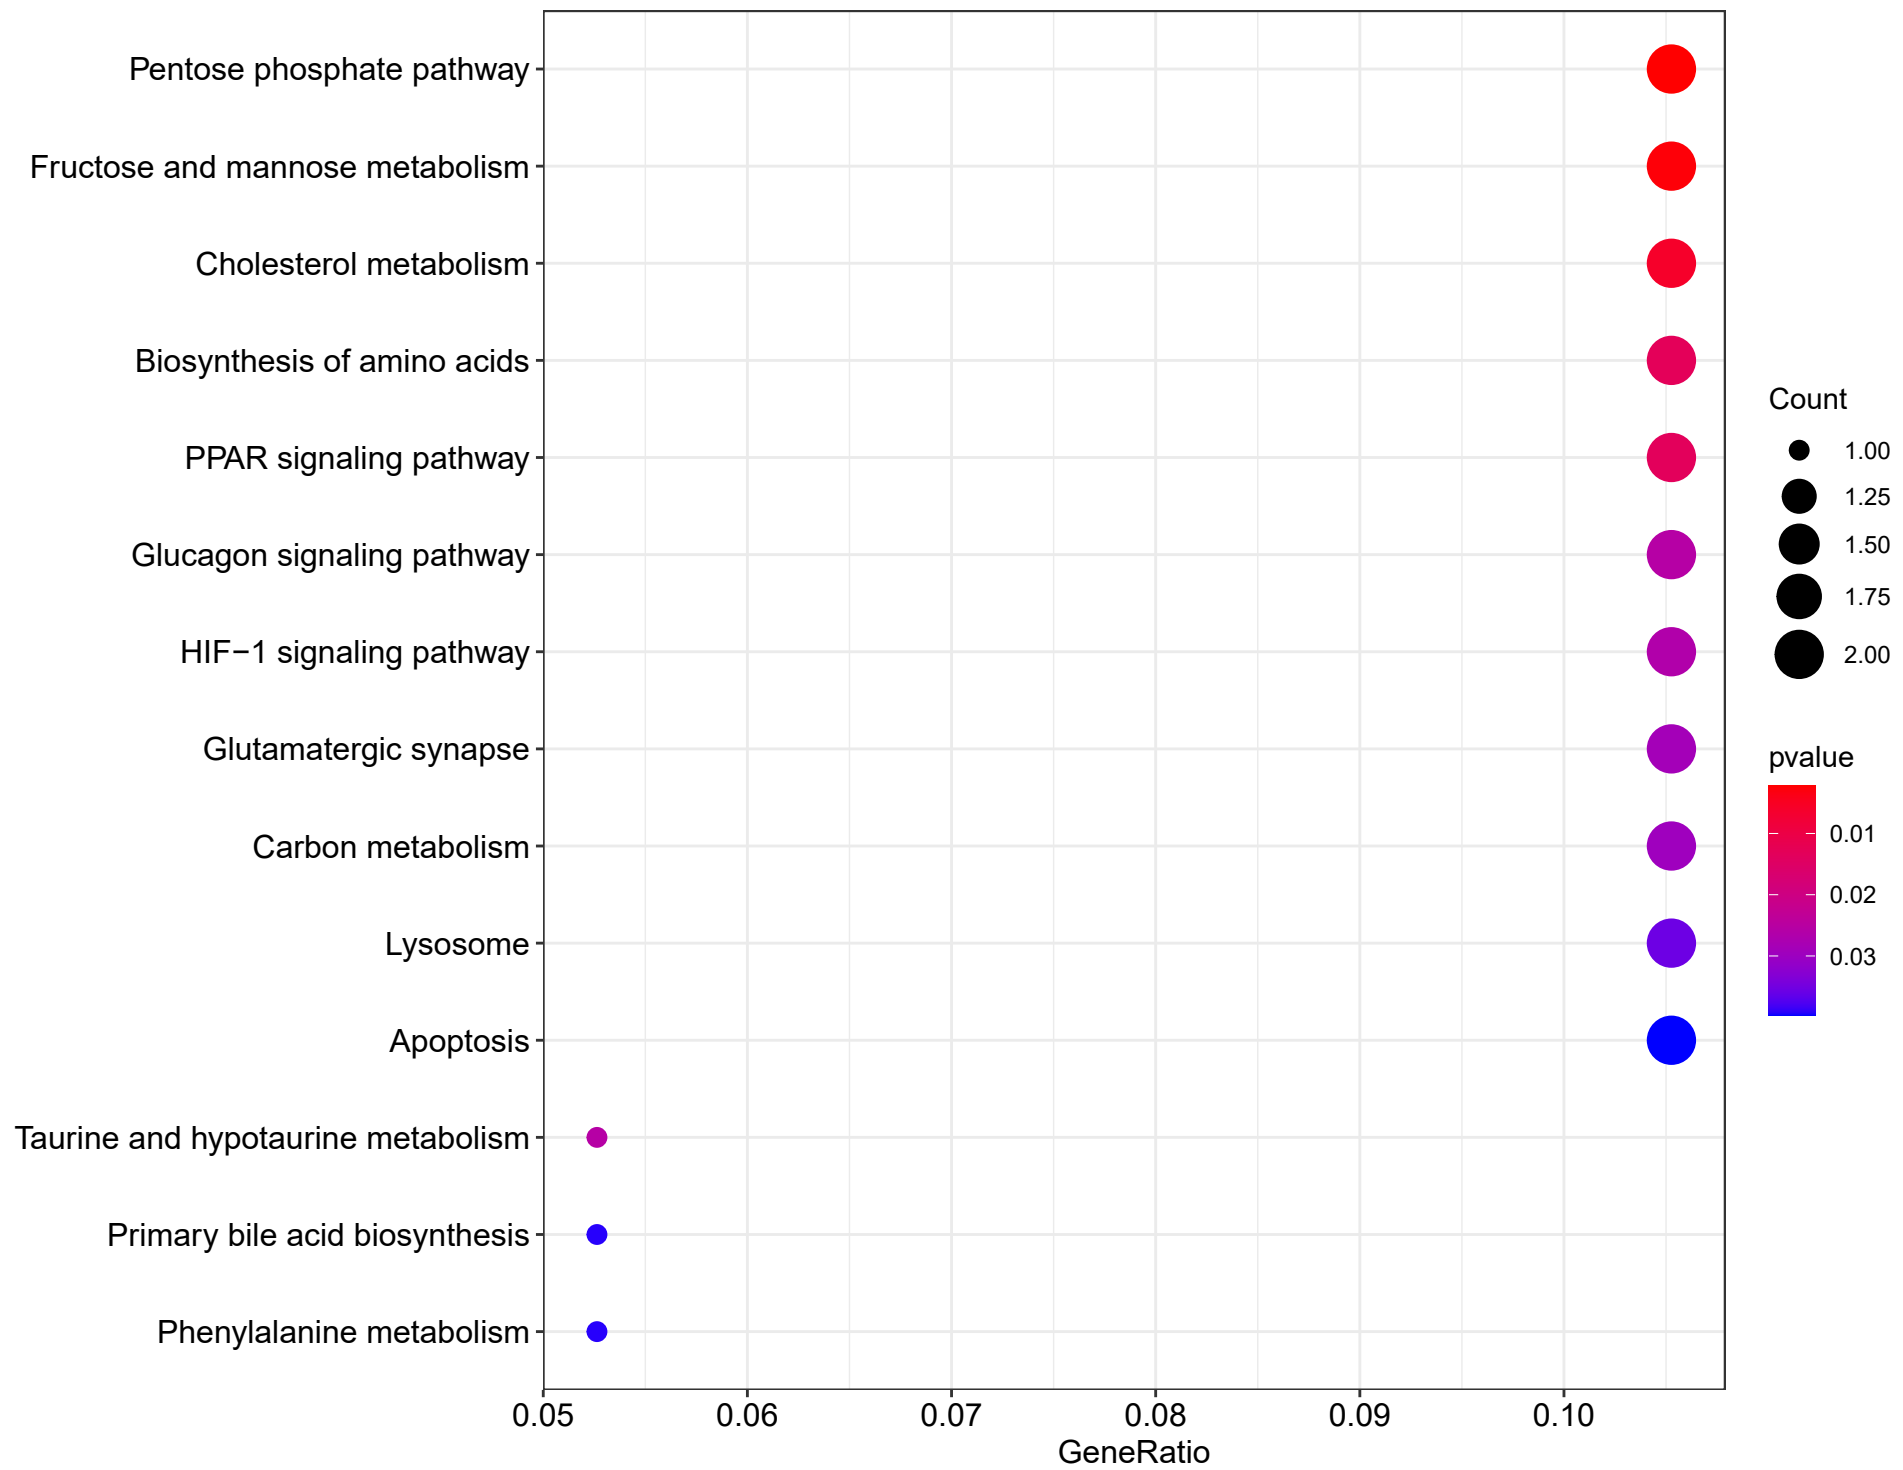

Supplement: JCTH-10-273-s024.pdf [file JCTH-10-273-s024.pdf]
